# Supplementary material
Source: MDPI journal article supplement (https://www.mdpi.com/2075-4701/8/1/16)
Supplement: s1 [file s1]

# On Sluggish Diffusion in Fcc Al–Co–Cr–Fe–Ni High-Entropy Alloys: An Experimental and Numerical Study

Qin Li <sup>1</sup>, Weimin Chen <sup>1</sup>, Jing Zhong <sup>1</sup>, Lijun Zhang <sup>1,\*</sup>, Qing Chen <sup>2</sup> and Zi-Kui Liu <sup>3</sup>

## Supplementary Material

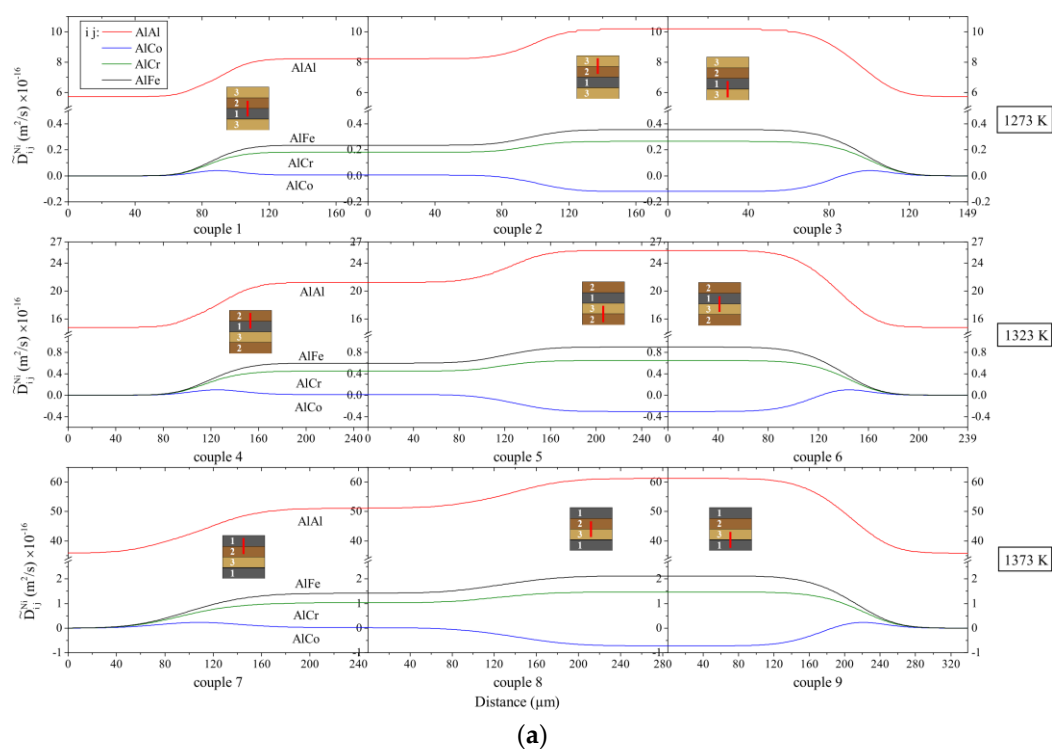

(a)

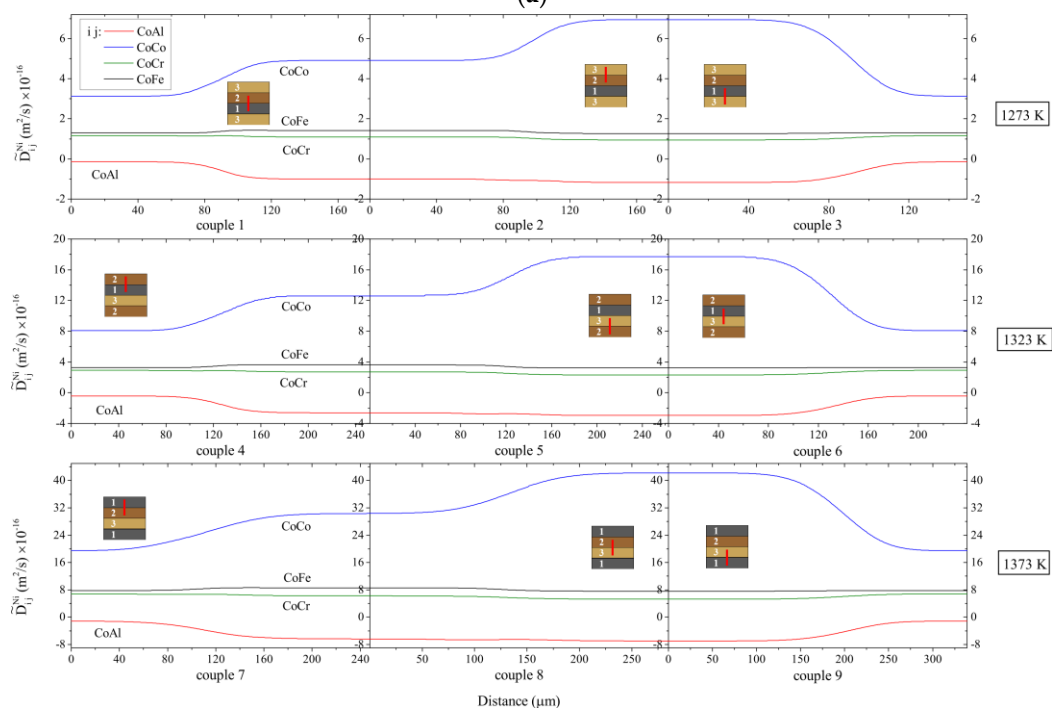

(b)

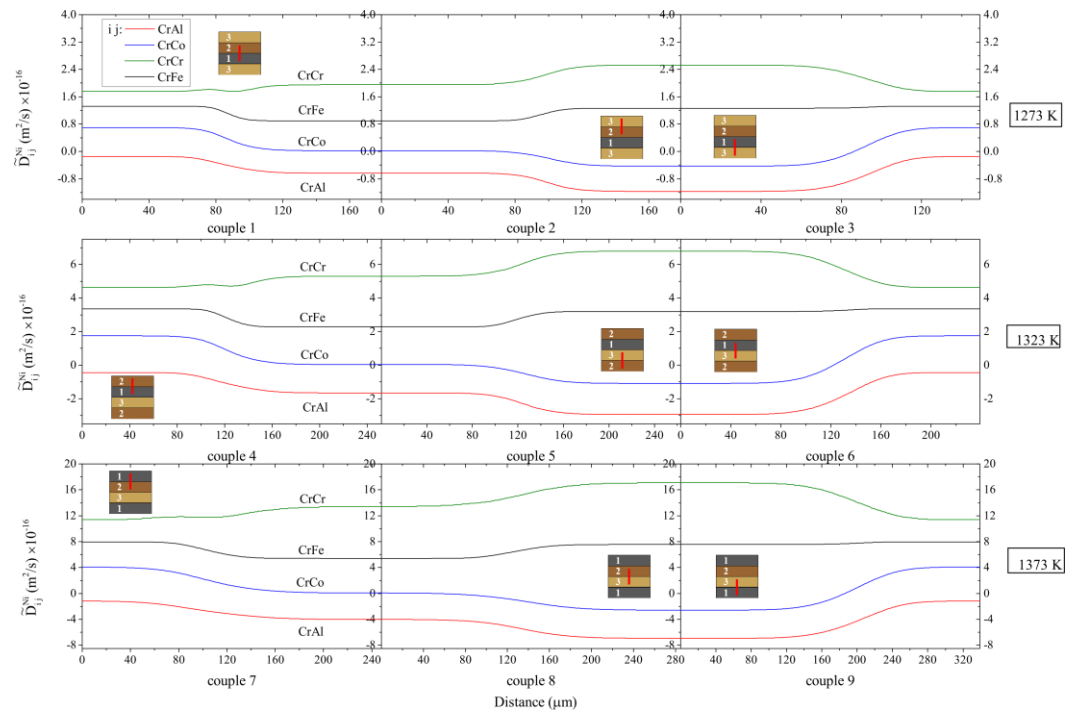

(c)

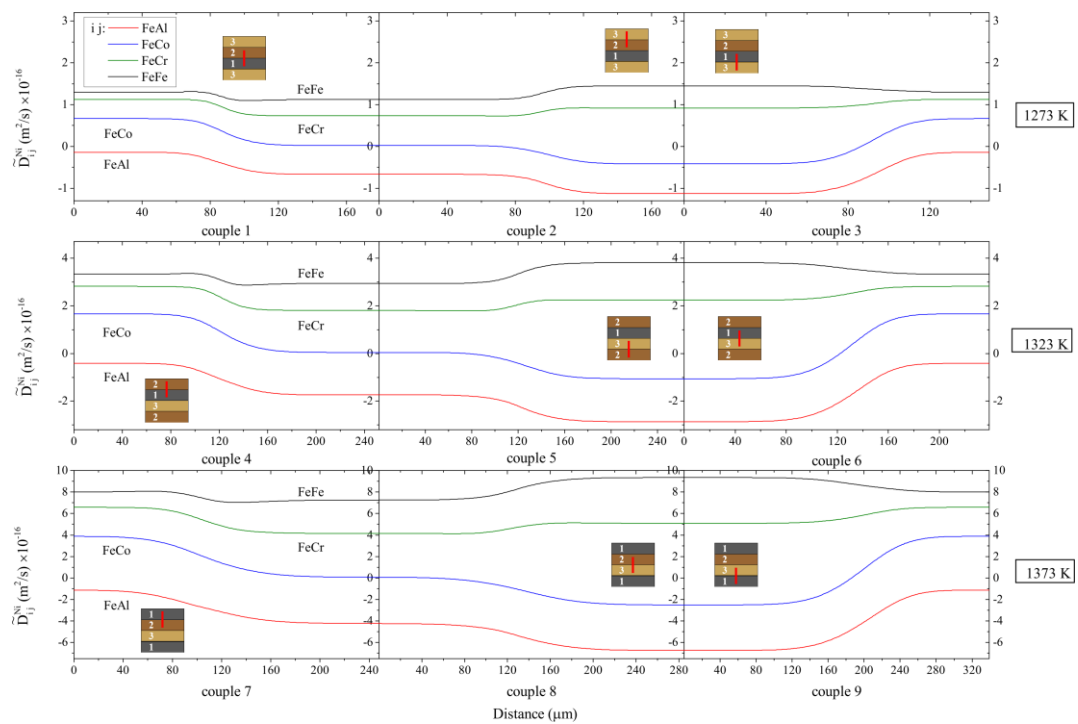

(d)

**Figure S1.** The evaluated diagonal and off-diagonal interdiffusivities for (a) Al, (b) Co, (c) Cr, and (d) Fe in the diffusion multiples annealed for 46 h at 1273 K, 1323 K and 1373 K, respectively, where Ni is taken as the dependent component.

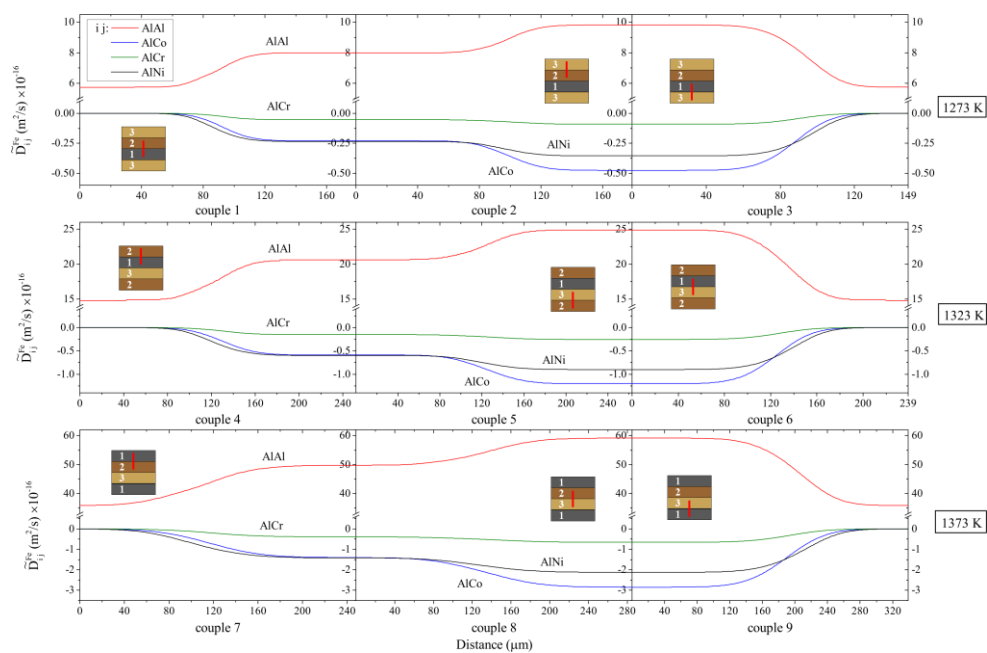

(a)

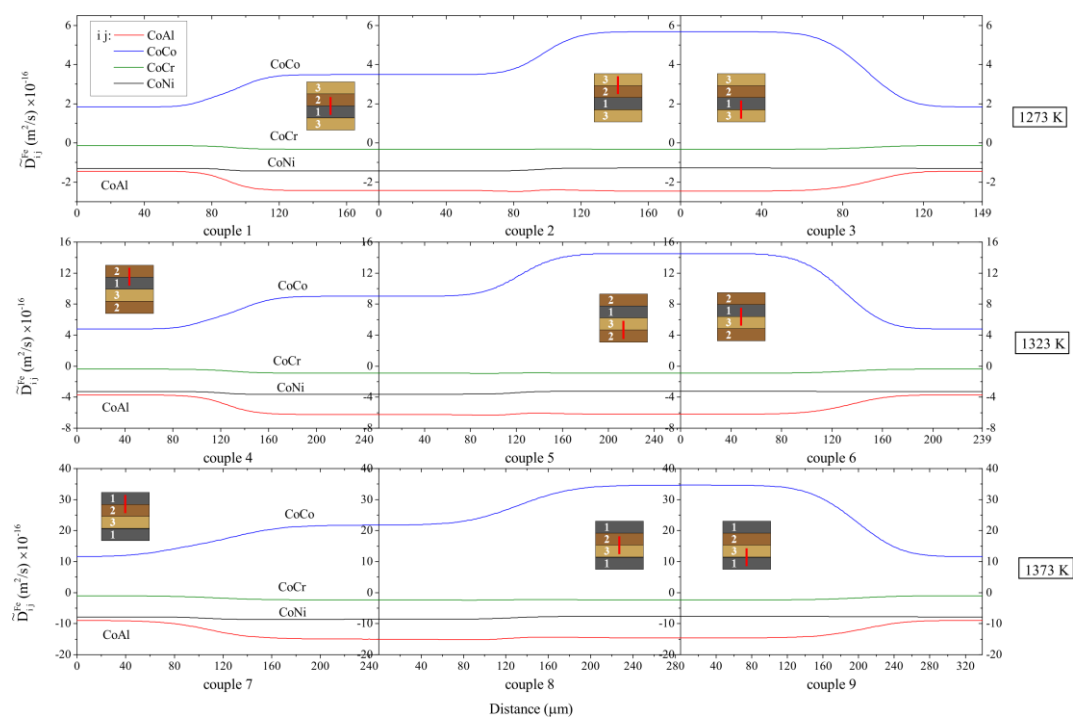

(b)

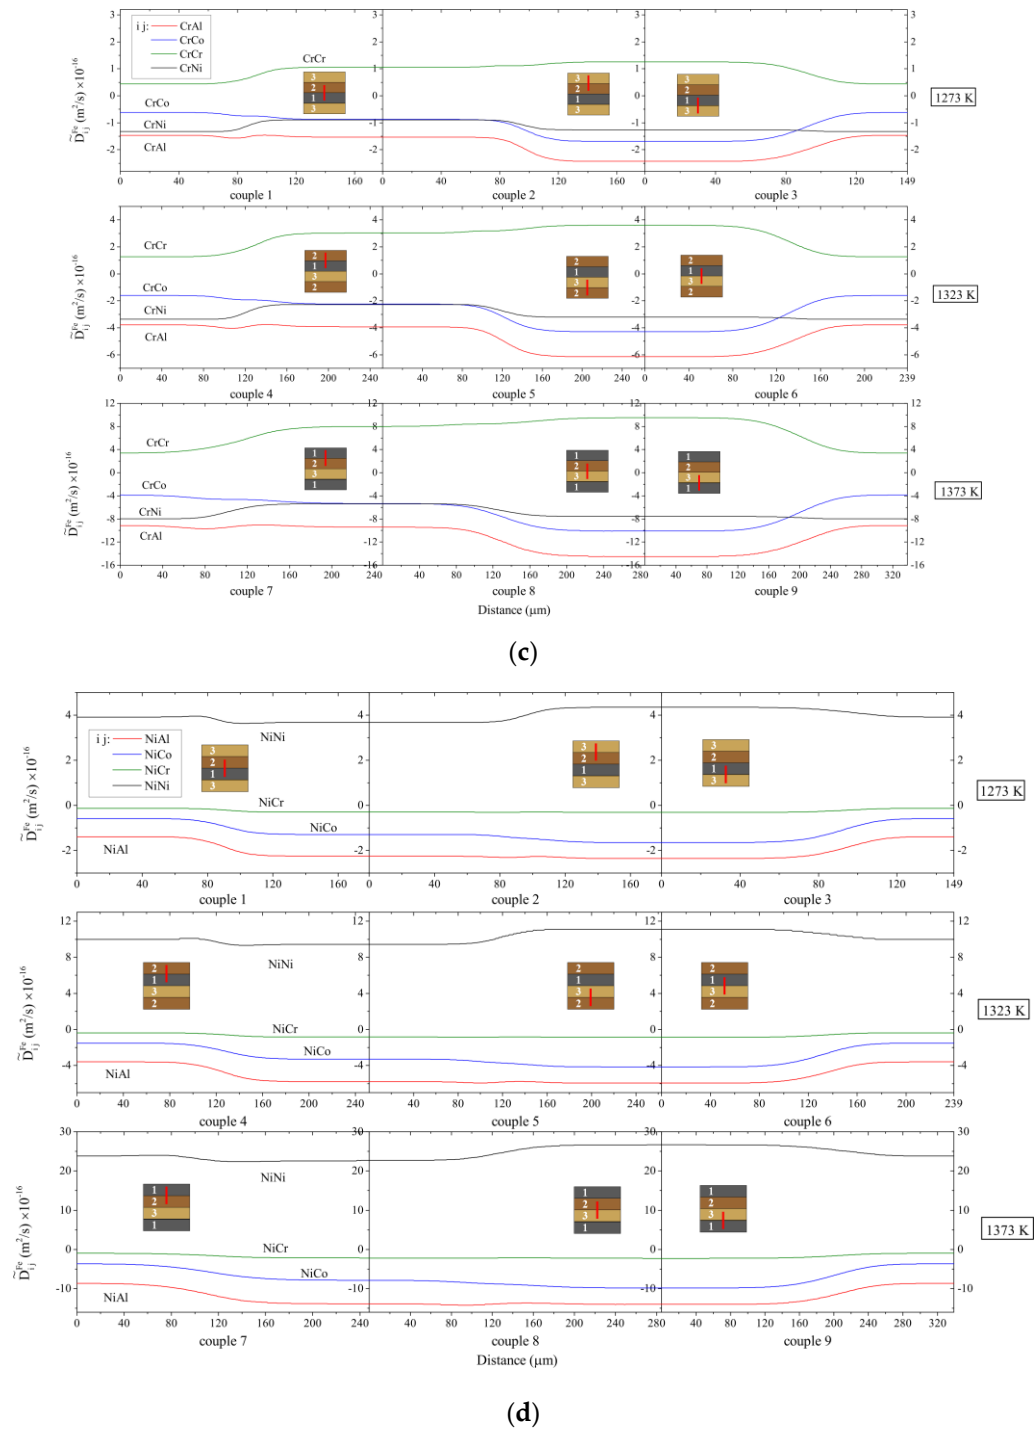

**Figure S2.** The evaluated diagonal and off-diagonal interdiffusivities for (a) Al, (b) Co, (c) Cr, and (d) Ni in the diffusion multiples annealed for 46 h at 1273 K, 1323 K and 1373 K, respectively, where Fe is taken as the dependent component.
